# Supplementary material for: Microfluidic-assisted growth of colloidal crystals
Source: Royal Society of Chemistry journal article supplement (doi:10.1039/c2sm07149e), 2012-01-01
Supplement: c2sm07149e.pdf [file c2sm07149e.pdf]

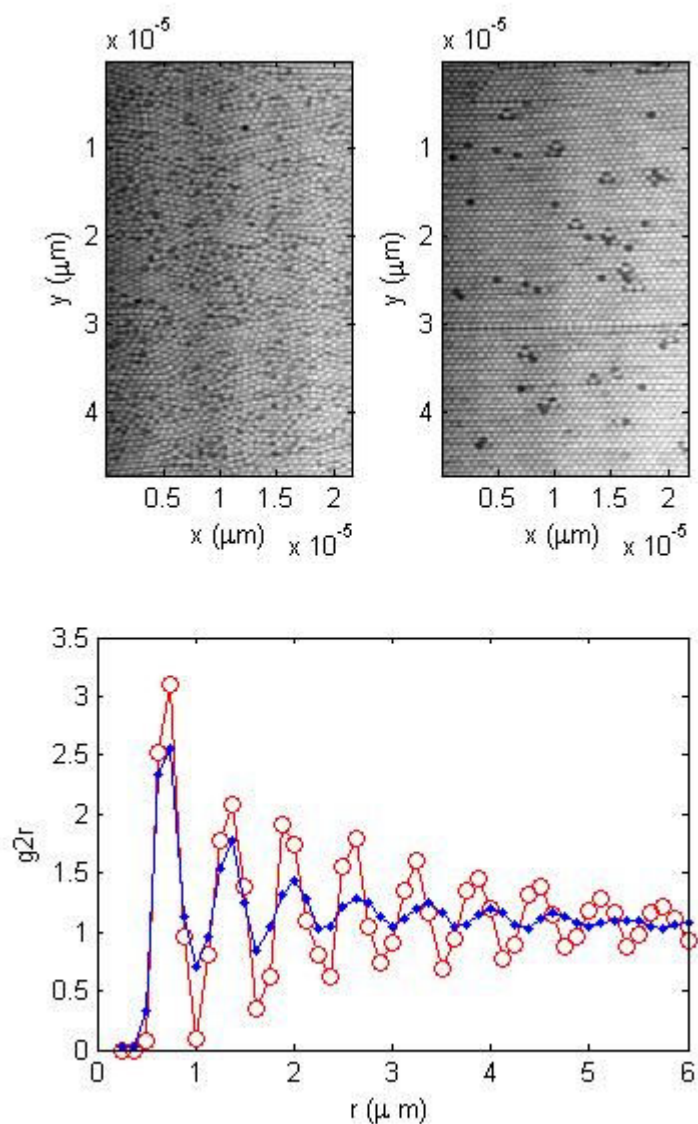

Pair correlation function calculated from image analysis: we extract two typical images from the so-called crystalline and amorphous phases, see the confocal microscopy micrographs above, we detect the position of the colloids and calculate  $g(r)$ . The red curve corresponds to the crystalline case while the blue one to the amorphous structure.
